# Supplementary material for: Bright Light Therapy for Parkinson Disease: A Literature Review and Meta-Analysis of Randomized Controlled Trials
Source: MDPI journal article supplement (doi:10.3390/biology10111205), 2021-11-19
Supplement: s1 [file s1]

## Supplementary Information

**Supplementary Table S1.** Characteristics of the Inclusion & Exclusion criteria studies suitable for the qualitative meta-analysis.

| Author<br>[year]         | Inclusion criteria                                                                                                | Exclusion criteria                                                                                                                                                                                                                                                                                                                   |
|--------------------------|-------------------------------------------------------------------------------------------------------------------|--------------------------------------------------------------------------------------------------------------------------------------------------------------------------------------------------------------------------------------------------------------------------------------------------------------------------------------|
| Paus et al. [2007]       | Stage I to IV<br>MMSE $\geq$ 24                                                                                   | If took potentially photosensitizing medication, e.g. imipramine, lithium; changes of any medication during the last two weeks; with suicidal risk in judgment of the investigators; with signs of dementia as measured by MMSE $\leq$ 23                                                                                            |
| Videnovic et al. [2017]  | Stages I to IV; ESS: $\geq$ 12<br>stable PD medication regimen<br>for at least 4 weeks                            | Atypical parkinsonian syndrome; significant sleep disordered breathing, defined as an apnea-hypopnea index $\geq$ 15 events per hour; significant periodic limb-movement disorder; REM sleep behavior disorder; cognitive impairment, MMSE $\leq$ 23, untreated hallucinations or psychosis                                          |
| Willis [2018]            | H&Y I to III<br>age $\geq$ 45<br>receiving dopamine agonists<br>replacement $\geq$ 12 months                      | Concurrent involvement in another study; patients that were medically complicated; history of psychiatric illness; history of alcohol or narcotic abuse; severe depression or suicidal tendencies; pregnancy; use of photosensitizing drugs; pre-existing major joint problems; cognitive impairment or focal neurological deficits. |
| Rutten et al [2019]      | PD with MDD according to DSM-IV-TR; stable dose of antiparkinsonian and psychopharmacologic agents $\geq$ 4 weeks | Current psychosis; (relative) contraindication for BLT such as a bipolar disorder; increased risk of photosensitization due to medication use or a medical disorder                                                                                                                                                                  |
| Raymackers et al. [2019] | PD                                                                                                                | Participating in other studies were not eligible.                                                                                                                                                                                                                                                                                    |

PD, Parkinson disease; MDD, Major Depressive Disorder; MMSE, Mini-Mental State Examination; BLT, Bright light therapy; H&Y, Hoehn and Yahr; ESS, excessive daytime sleepiness; REM, rapid eye movement

**Supplementary Table S2.** Characteristics of the light exposure measurement from the studies suitable for the qualitative meta-analysis.

| Author<br>[year]                | Light exposure measurement                                                                                                                                                                                                                                                                                                                     |
|---------------------------------|------------------------------------------------------------------------------------------------------------------------------------------------------------------------------------------------------------------------------------------------------------------------------------------------------------------------------------------------|
| <b>Paus et al. [2007]</b>       | A commercially available white fluorescent light boxes by Philips, model Bright Light Energy, product number HF3304 with head-to-light distance of 20 cm in the active treatment, and 100 cm in the placebo group. Illuminance was measured with a luminance meter and was 7.500 lux in the active treatment and 950 lux in the placebo group. |
| <b>Videnovic et al. [2017]</b>  | A light box (SunRay; The SunBox Co) was used for LT administration. The box was placed 86.4 cm away from the subject, and an 86.4-cm string attached from its side.                                                                                                                                                                            |
| <b>Willis [2018]</b>            | A light source containing fluorescent tubes (Apollo BL-6, without ultra-violet emission) with positioning the device at a distance of about 0.8 to 1M from the bridge of the nose to the diffuser.                                                                                                                                             |
| <b>Rutten et al [2019]</b>      | A Brazil Lightbox (Lumie, Cambridge, UK), which emits daylight spectrum light with an intensity of 10,000 lux at a 30- to 40-cm distance.                                                                                                                                                                                                      |
| <b>Raymackers et al. [2019]</b> | A portable head-mounted device (LuminetteR, Lucimed SA, Villers-le-Bouillet, Belgium) was used for both active BLT and placebo therapy.                                                                                                                                                                                                        |
